# Supplementary material
Source: publisher figshare collection journal article supplement (https://future-science-group.figshare.com/ndownloader/files/31631321)
Supplement: Supplementary file 1 [file 31631321]

**Supplementary Material**

Supplementary Figure 1. Quality Assessment of RCTs
